# Supplementary material for: Substitution of the Native Zn(II) with Cd(II), Co(II) and Ni(II) Changes the Downhill Unfolding Mechanism of Ros87 to a Completely Different Scenario
Source: PubMed Central journal article supplement (PMC7663847; doi:10.3390/ijms21218285), 2020-11-05
Supplement: ijms-21-08285-s001.pdf [file ijms-21-08285-s001.pdf]

## SUPPORTING INFORMATION

for

### **Substitution of the native Zn(II) with Cd(II), Co(II) and Ni(II) changes the downhill unfolding mechanism of Ros87 to a completely different scenario**

Rinaldo Grazioso<sup>1</sup>, Sara García-Viñuales<sup>2</sup>, Luigi Russo<sup>1</sup>, Gianluca D'Abrosca<sup>1</sup>, Sabrina Esposito<sup>1</sup>, Laura Zaccaro<sup>3</sup>, Rosa Iacovino<sup>1</sup>, Danilo Milardi<sup>2</sup>, Roberto Fattorusso<sup>1</sup>, Gaetano Malgieri<sup>1\*</sup> and Carla Isernia<sup>1\*</sup>

1: Department of Environmental, Biological and Pharmaceutical Science and Technology – University of Campania - Luigi Vanvitelli, via Vivaldi 43, 81100 Caserta (Italy).

2: Institute of Crystallography-CNR, Via Paolo Gaifami 18, 95126 Catania (Italy).

3: Institute of Biostructures and Bioimaging-CNR (Naples), Via Mezzocannone 16, 80134 Naples, Italy

\*to whom correspondence should be addressed

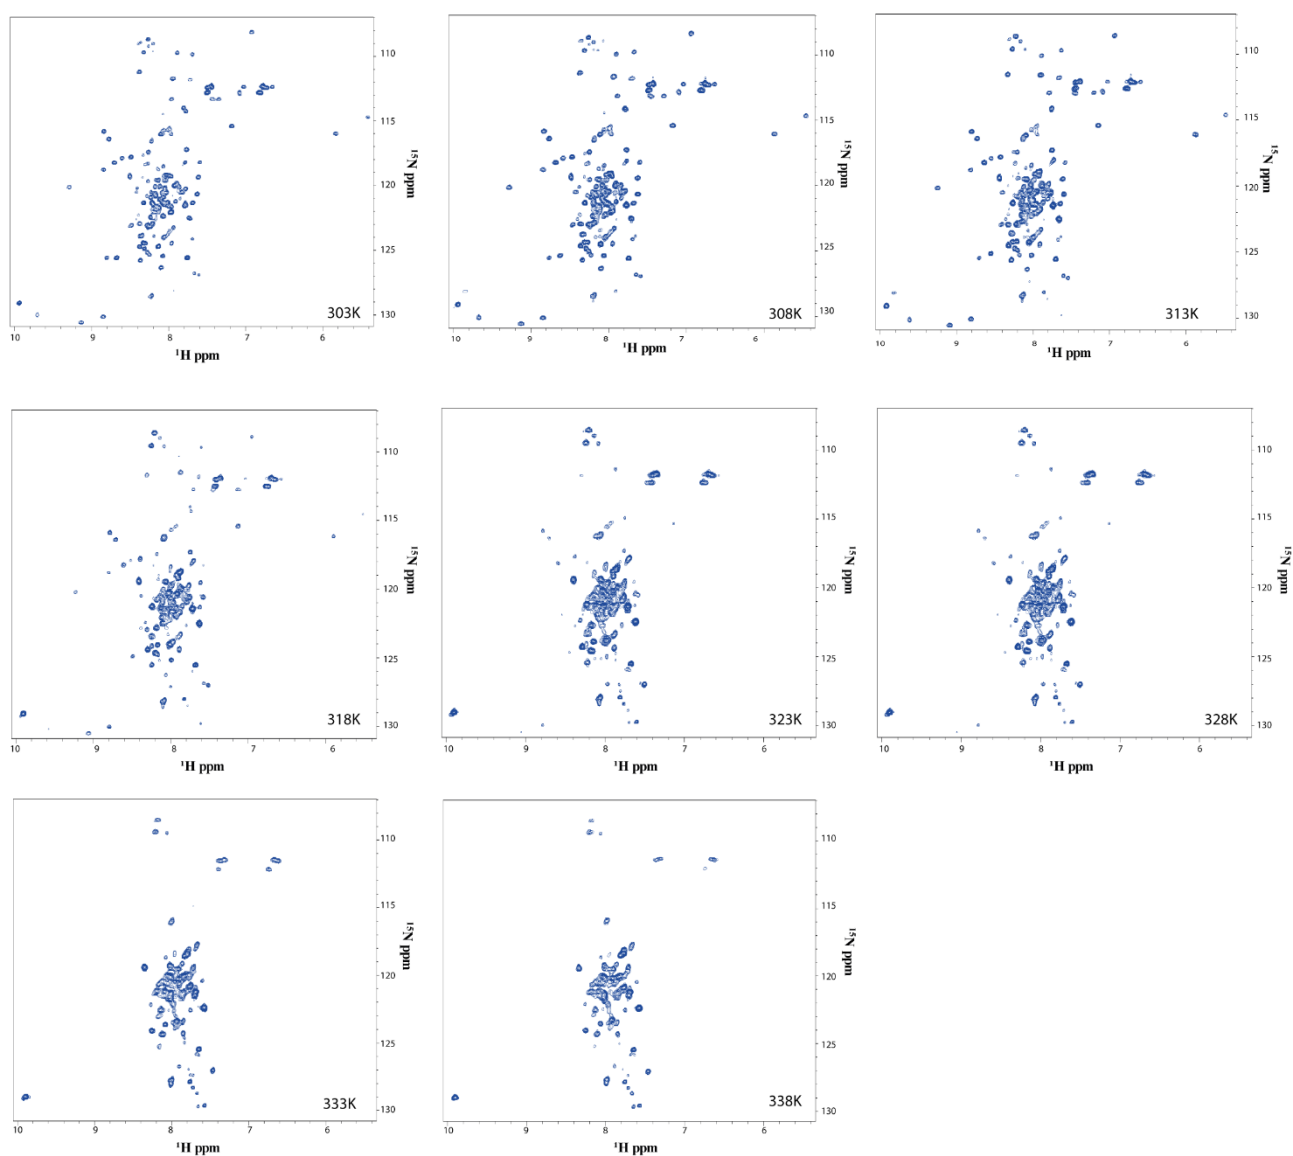

**Figure S1.** Thermal unfolding of Co(II)-Ros87 via NMR:  $^1\text{H}$ - $^{15}\text{N}$  HSQC spectra acquired at different temperatures using a 600 MHz spectrometer.

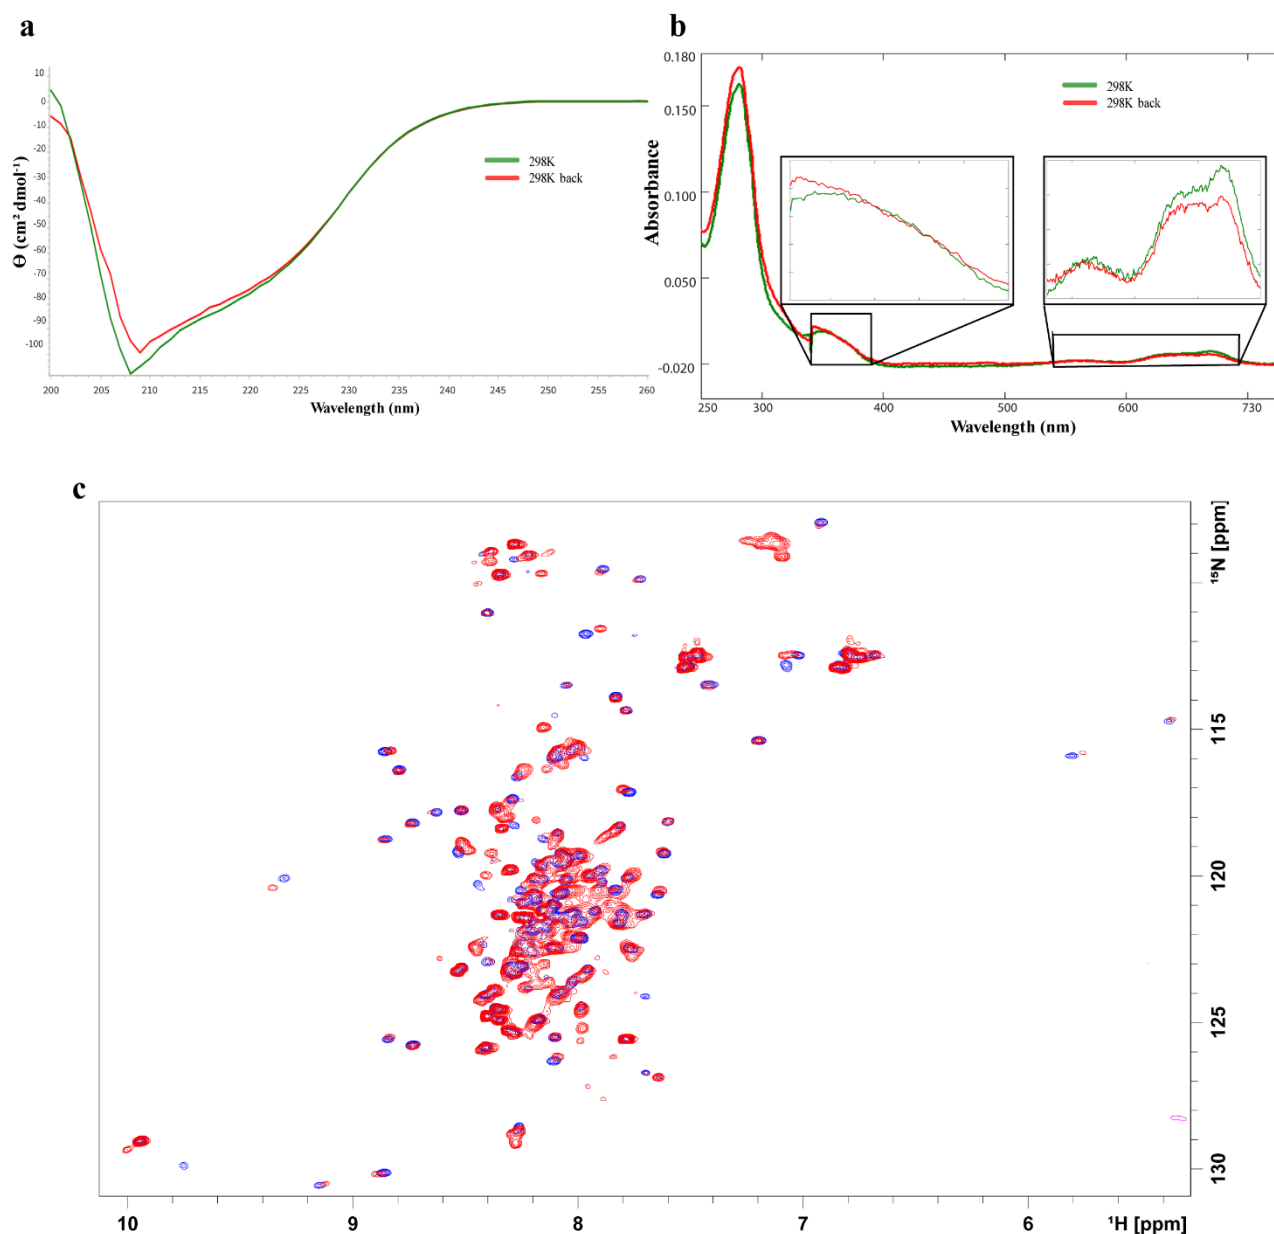

**Figure S2.** Reversibility of the thermal unfolding of Co(II)-Ros87. **a**) CD spectra acquired at 298 K before (green) and after heating the sample at 368 K (red). **b**) UV-Vis spectra at 298 K before (green) and after heating the sample at 368 K (red); the most significant regions of the spectrum are magnified (350-400nm and 550-690nm). **c**) superposition of the <sup>1</sup>H-<sup>15</sup>N HSQC spectra of Co(II)-Ros87 acquired at 298 K before (blue) and after heating the sample at 343 K (red), respectively.

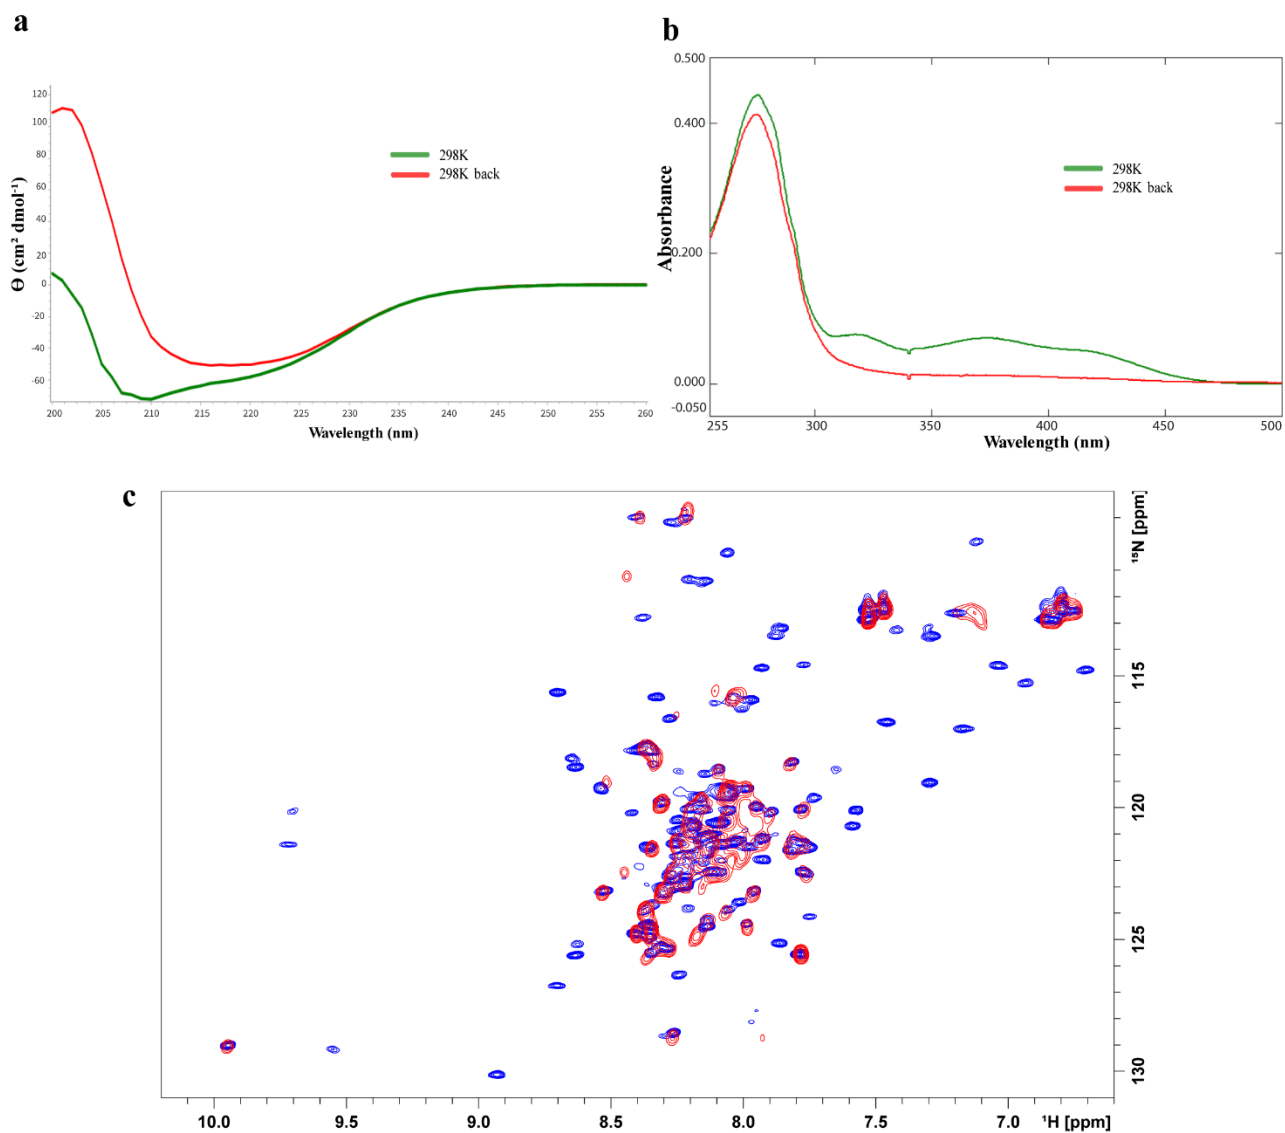

**Figure S3.** Reversibility of the thermal unfolding of Ni(II)-Ros87. **a)** CD spectra acquired at 298 K before (green) and after heating the sample to 368 K (red), respectively. **b)** UV-Vis spectra at 298 K before (green) and after heating the sample at 368 K (red). **c)** superposition of the  $^1\text{H}$ - $^{15}\text{N}$  HSQC spectra of Ni(II)-Ros87 recorded at 298K before (blue) and after heating the sample at 343K (red).

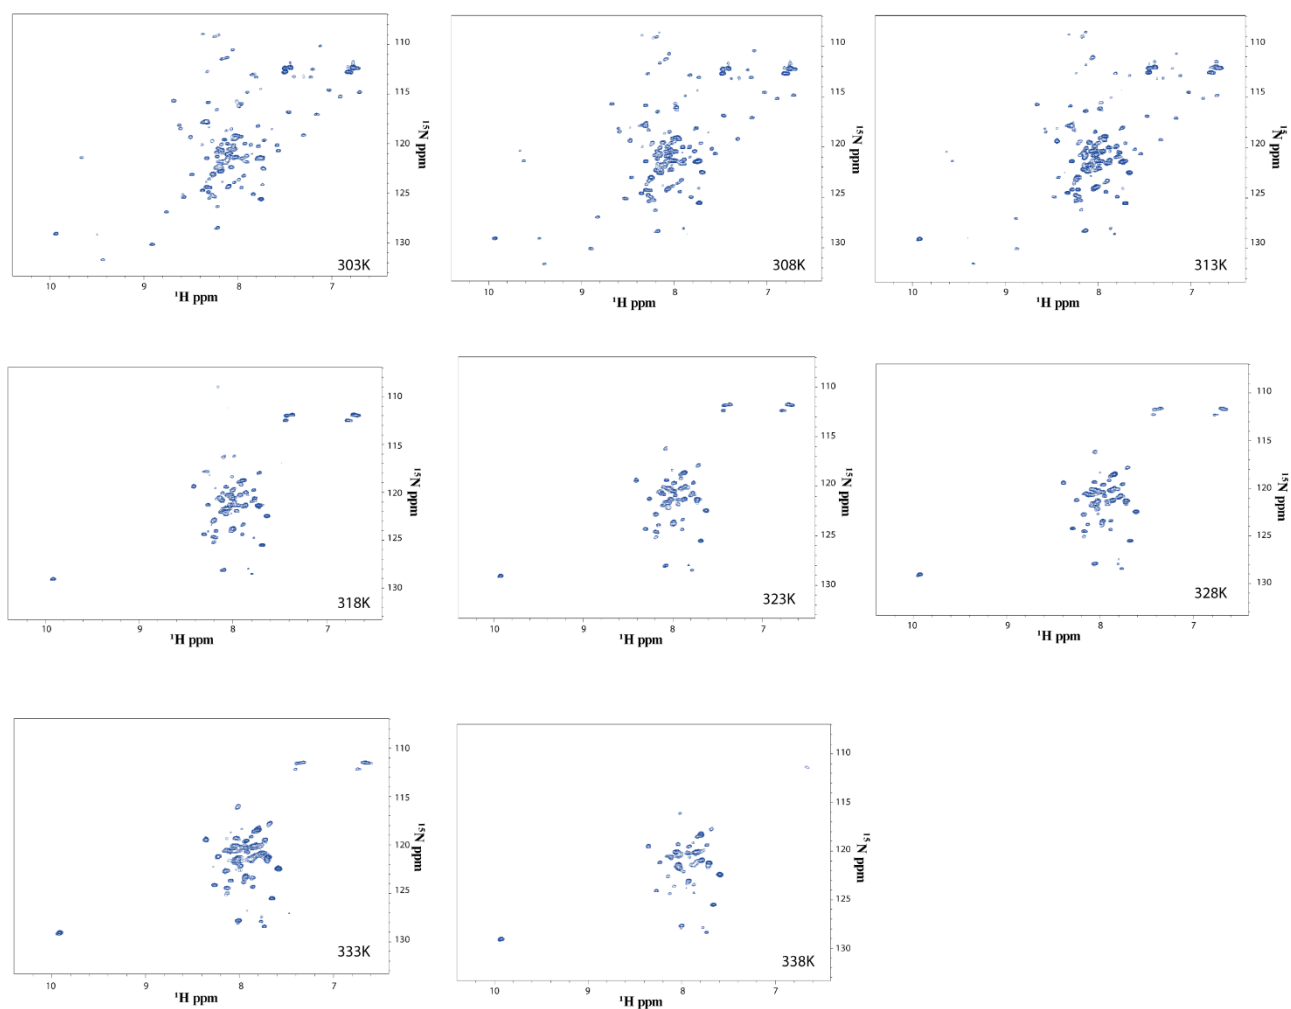

**Figure S4.** Thermal unfolding of Ni(II)-Ros87 monitored via NMR:  $^1\text{H}$ - $^{15}\text{N}$  HSQC spectra measured at different temperatures.

| $\Delta\delta_{\text{HN}}/\Delta T$ (ppb/K)                 | Residues with non linear coefficients                                                                                    | Residues with linear coefficients                                                                                                                                    |
|-------------------------------------------------------------|--------------------------------------------------------------------------------------------------------------------------|----------------------------------------------------------------------------------------------------------------------------------------------------------------------|
| >-4.6                                                       | SER16<br>VAL 23<br>CYS24<br>GLY28<br>HIS37<br>SER43<br>MET44<br>GLU48<br>ARG50<br>TYR66                                  | GLN18<br>CYS27<br>GLU51<br>TRP53                                                                                                                                     |
| <-4.6                                                       | ASP20<br>LEU25<br>SER30<br>LEU34<br>LYS35<br>LEU38<br>HIS42<br>ALA69<br>GLY78<br>GLY80<br>ARG82<br>LYS84                 | GLU5<br>LYS6<br>GLN7<br>SER12<br>VAL13<br>ASP19<br>HIS21<br>GLY29<br>PHE31<br>ARG36<br>THR39<br>THR40<br>HIS41<br>THR45<br>ASP58<br>MET77<br>GLN87<br>ALA85<br>ARG87 |
| >-4.6 from 298 K to 323 K<br>and <-4.6 from 323K to<br>338K | VAL4<br>LYS8<br>ALA10<br>VAL17<br>GLU26<br>GLU47<br>LYS55<br>TYR59<br>ALA65<br>ALA68<br>SER71<br>ALA74<br>LYS75<br>LEU79 |                                                                                                                                                                      |

**Table S1.** Amide-proton temperature coefficients (ppb/K) of Ni(II)-Ros87.

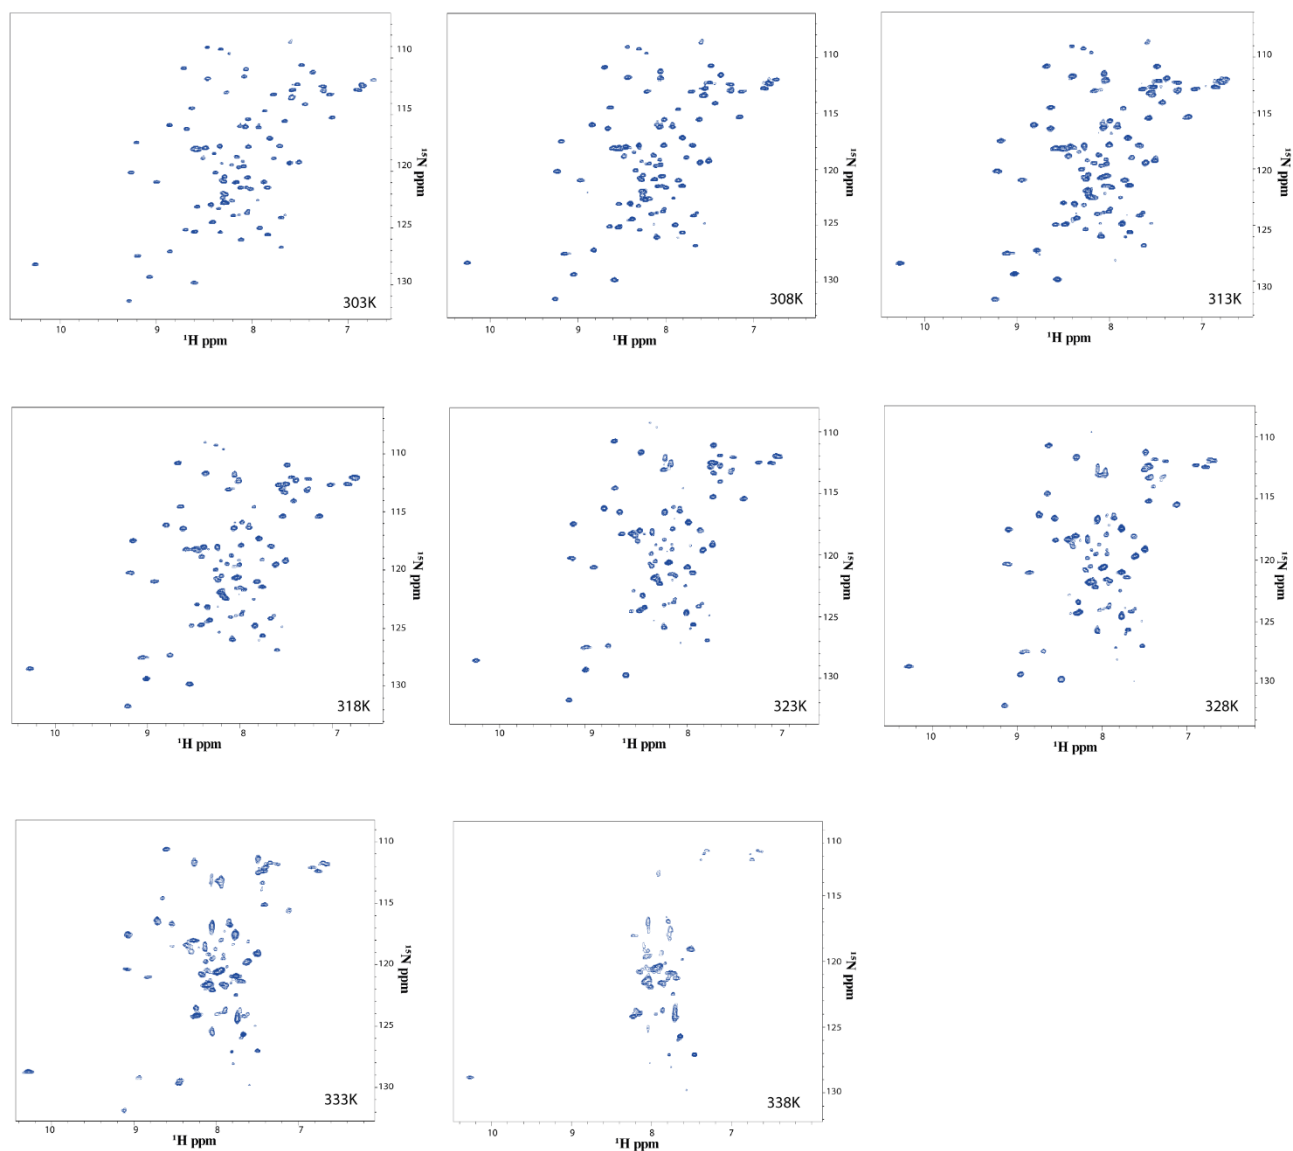

**Figure S5.** Thermal unfolding of Cd(II)-Ros87 investigated by NMR:  $^1\text{H}$ - $^{15}\text{N}$  HSQC spectra collected at different temperatures.

| $\Delta\delta_{\text{HN}}/\Delta T$ (ppb/K)                 | Residues with non linear coefficients                                                                                      | Residues with linear coefficients                                                                                                                                    |
|-------------------------------------------------------------|----------------------------------------------------------------------------------------------------------------------------|----------------------------------------------------------------------------------------------------------------------------------------------------------------------|
| >-4.6                                                       | SER16<br>CYS24<br>GLY29<br>SER33<br>HIS 37<br>ARG50<br>GLU51                                                               | GLN18<br>LYS35<br>SER43<br>GLU48<br>TYR49<br>TRP53<br>TYR66                                                                                                          |
| <-4.6                                                       | ALA10<br>VAL13<br>ASP19<br>ILE22<br>VAL23<br>CYS27<br>LEU38<br>THR45<br>LEU55<br>VAL57<br>TYR59<br>GLU68<br>GLN81<br>ARG87 | VAL4<br>GLU5<br>GLN7<br>VAL17<br>HIS21<br>SER30<br>PHE31<br>LEU34<br>ARG36<br>THR39<br>THR40<br>HIS41<br>ALA65<br>ALA74<br>LYS75<br>MET77<br>GLY80<br>ARG82<br>ALA85 |
| >-4.6 from 298 K to 323 K<br>and <-4.6 from 323K to<br>338K | LYS6<br>SER12<br>LEU25<br>GLU26<br>MET44<br>GLU47<br>LYS52<br>ASP58<br>ALA63<br>ALA69<br>ARG70<br>GLU76<br>GLY78<br>LEU79  | MET61<br>LEU73                                                                                                                                                       |

**Table S2.** Amide-proton temperature coefficients (ppb/K) of Cd(II)-Ros87.



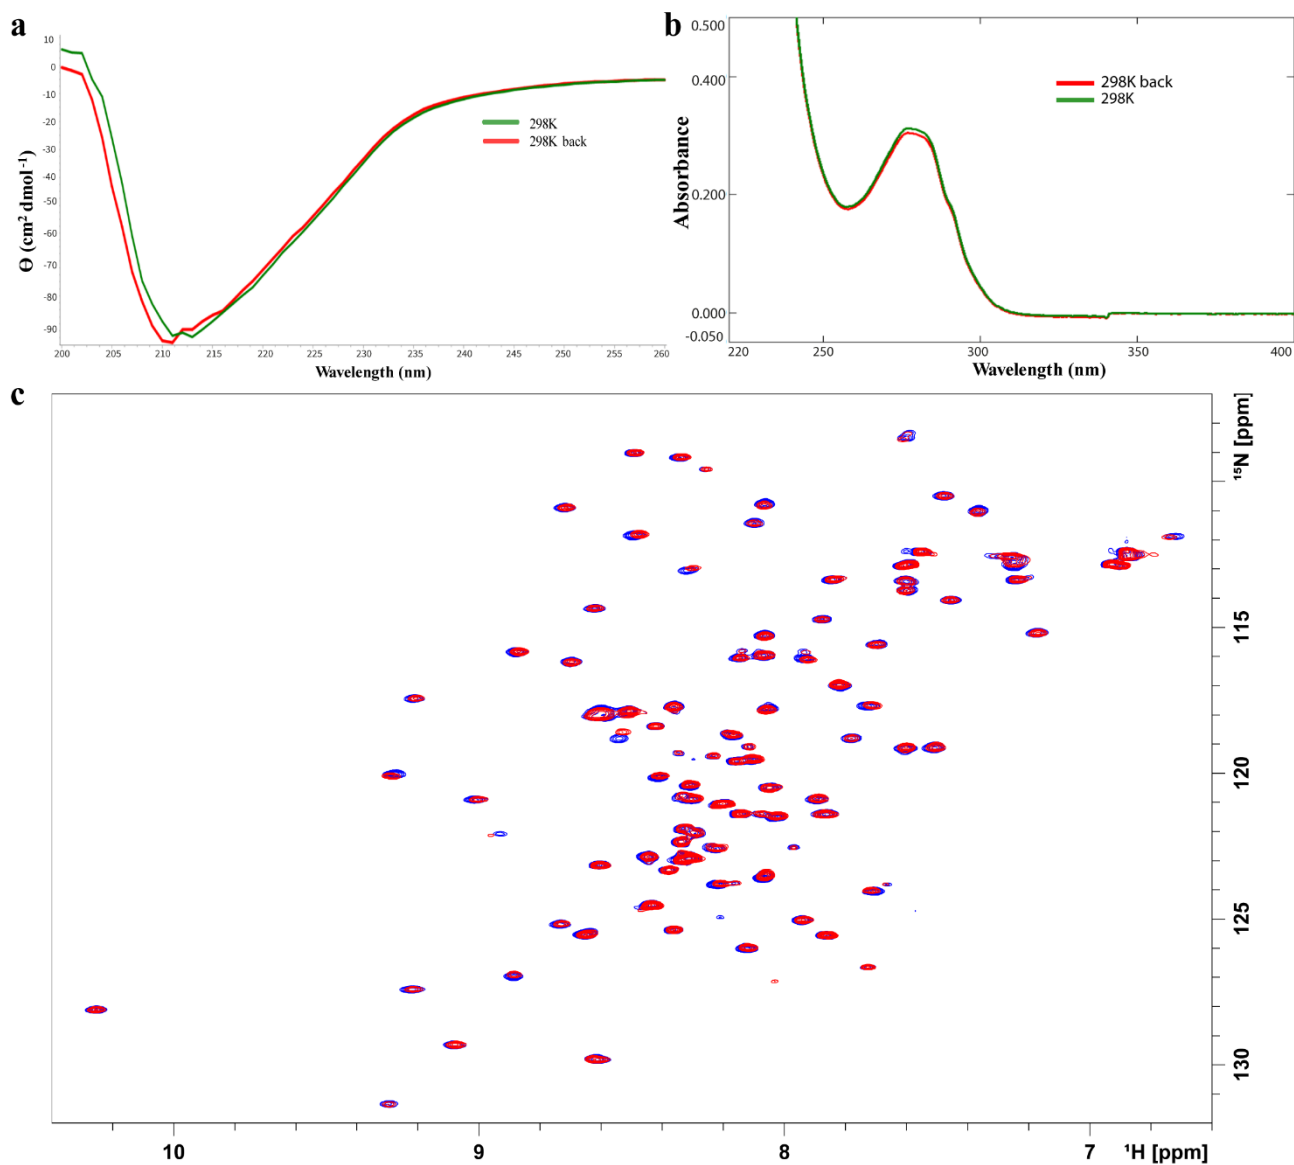

**Figure S6.** Reversibility of the thermal unfolding of Cd(II)-Ros87. **a)** CD spectra acquired at 298 K before (green) and after heating the sample at 368 K (red). **b)** UV-Vis spectra at 298 K before (green) and after heating the sample at 368K (red). **c)** superposition of the <sup>1</sup>H-<sup>15</sup>N HSQC spectra of Cd(II)-Ros87 at 298K before (blue) and after heating the sample at 343K (red).

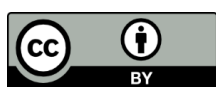

© 2020 by the authors. Licensee MDPI, Basel, Switzerland. This article is an open access article distributed under the terms and conditions of the Creative Commons Attribution (CC BY) license (<http://creativecommons.org/licenses/by/4.0/>).
